# Supplementary material for: Quantitative real-time PCR analysis of Anopheles dirus TEP1 and NOS during Plasmodium berghei infection, using three reference genes
Source: PeerJ. 2017 Jul 26;5:e3577. doi: 10.7717/peerj.3577 (PMC5533154; doi:10.7717/peerj.3577)
Supplement: File S3 [file peerj-05-3577-s003.xlsx]

## Sheet: Sheet 1
	12 h PI			24 h PI			48 h PI			Day 5 PI
	Mean	SEM	N	Mean	SEM	N	Mean	SEM	N	Mean	SEM	N
NOS	0.95995	0.17628	4	1.15097	0.19544	4	1.8	0.1899	4	1.14727	0.21278	4
TEP1	1.04183	0.16351	4	3.11531	0.55655	4	1.32867	0.12864	4	1.295	0.28193	4
Table Analyzed	NOS
One-way analysis of variance
P value	0.0463
P value summary	*
Are means signif. different? (P < 0.05)	Yes
Number of groups	4
F	3.596
R squared	0.4734
ANOVA Table	SS	df	MS
Treatment (between columns)	1.625	3	0.5415
Residual (within columns)	1.807	12	0.1506
Total	3.432	15
Tukey's Multiple Comparison Test	Mean Diff.	q	Significant? P < 0.05?	Summary	95% CI of diff
12 h vs 24 h	-0.191	0.9844	No	ns	-1.006 to 0.6238
12 h vs 48 h	-0.8401	4.329	Yes	*	-1.655 to -0.02527
12 h vs Day 5	-0.1873	0.9654	No	ns	-1.002 to 0.6275
24 h vs 48 h	-0.649	3.345	No	ns	-1.464 to 0.1658
24 h vs Day 5	0.0037	0.01907	No	ns	-0.8111 to 0.8185
48 h vs Day 5	0.6527	3.364	No	ns	-0.1621 to 1.468
Table Analyzed	TEP1
One-way analysis of variance
P value	0.0028
P value summary	**
Are means signif. different? (P < 0.05)	Yes
Number of groups	4
F	8.441
R squared	0.6785
ANOVA Table	SS	df	MS
Treatment (between columns)	10.95	3	3.651
Residual (within columns)	5.19	12	0.4325
Total	16.14	15
Tukey's Multiple Comparison Test	Mean Diff.	q	Significant? P < 0.05?	Summary	95% CI of diff
12 h vs 24 h	-2.073	6.306	Yes	**	-3.454 to -0.6927
12 h vs 48 h	-0.2868	0.8723	No	ns	-1.668 to 1.094
12 h vs Day 5	-0.2532	0.7699	No	ns	-1.634 to 1.128
24 h vs 48 h	1.787	5.433	Yes	*	0.4059 to 3.167
24 h vs Day 5	1.82	5.536	Yes	**	0.4396 to 3.201
48 h vs Day 5	0.03367	0.1024	No	ns	-1.347 to 1.414
